# Supplementary material
Source: publisher figshare collection journal article supplement (https://acs.figshare.com/ndownloader/files/20706864)
Supplement: Supplementary file 1 [file 20706864]

## Supporting Information

# Enhanced Electrochemiluminescence of Porphyrin-based Metal-Organic Frameworks Controlled *via* Coordination Modulation

Wen-Rong Cai<sup>†</sup>, Hai-Bo Zeng<sup>†</sup>, Huai-Guo Xue<sup>‡</sup>, Robert S. Marks<sup>§</sup>, Serge Cosnier<sup>&</sup>,  
Xue-Ji Zhang<sup>†</sup>, Dan Shan<sup>†\*</sup>

<sup>†</sup> MIIT Key Laboratory of Advanced Display Materials and Devices, School of Environmental and Biological Engineering, Nanjing University of Science and Technology, Nanjing 210094, China.

<sup>‡</sup> School of Chemistry and Chemical Engineering, Yangzhou University, Yangzhou 225002, China.

<sup>§</sup> Department of Biotechnology Engineering, Ben-Gurion University of the Negev, Beer-Sheva, Israel.

<sup>&</sup> University of Grenoble Alpes-CNRS, DCM UMR 5250, F-38000 Grenoble, France

\* Corresponding author:

Email: [danshan@njust.edu.cn](mailto:danshan@njust.edu.cn) (D. Shan)

Fax: 0086-25-84303107

## Table of contents

|                                                                              |         |
|------------------------------------------------------------------------------|---------|
| Figure S1. Spectroscopic properties of TCPP and BPS                          | Page S2 |
| Figure S2. Spectroscopic properties of Zn-TCPP and TCPP-Zn-BPS               | Page S3 |
| Figure S3. ECL response of BPS-Zn-TCPP                                       | Page S4 |
| Figure S4. Characterization of BPS-Zn-TCPP                                   | Page S5 |
| Figure S5. The possible ECL mechanism with O <sub>2</sub> as the co-reactant | Page S6 |
| Scheme S1. Schematic illustrations for the construction of BPS-Zn-TCPP       | Page S7 |

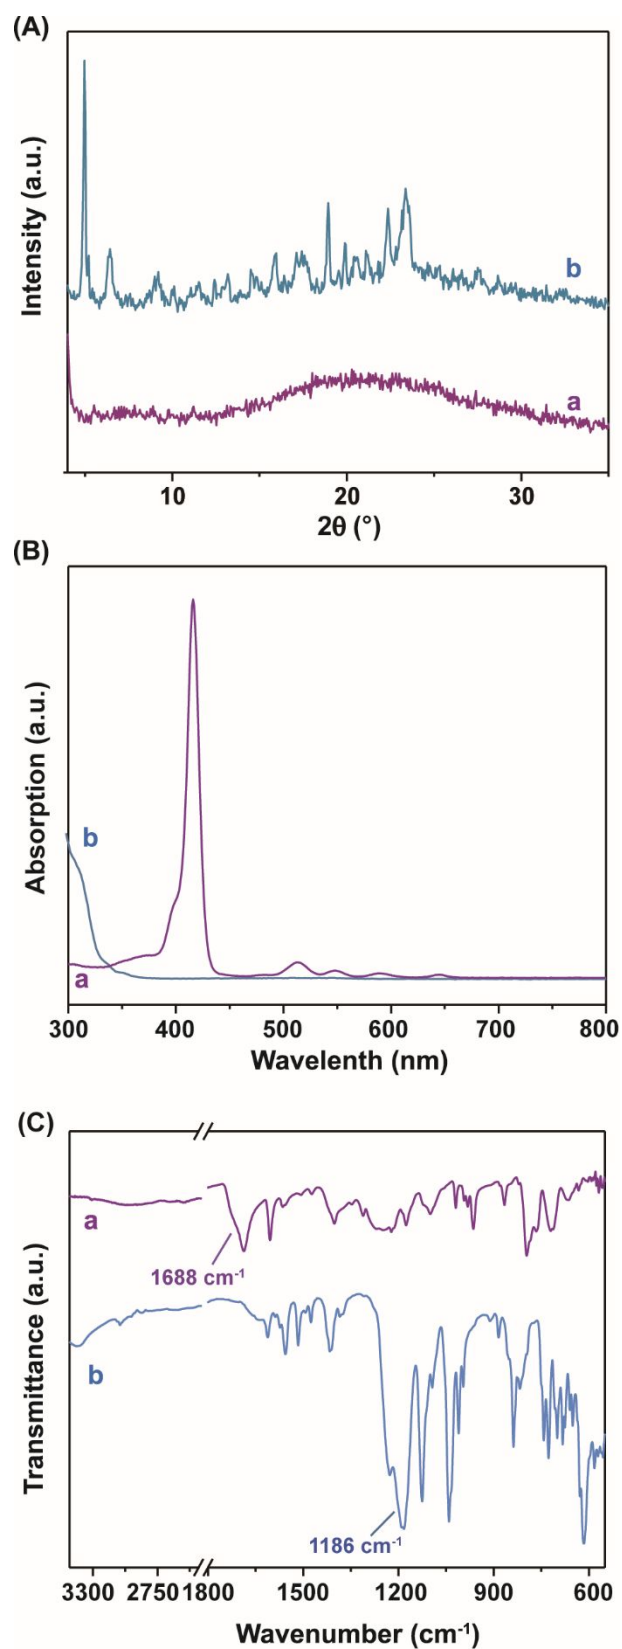

**Figure S1** (A) XRD powder pattern, (B) UV-vis absorption spectra and (C) FT-IR spectra of TCPP (a) and BPS (b).

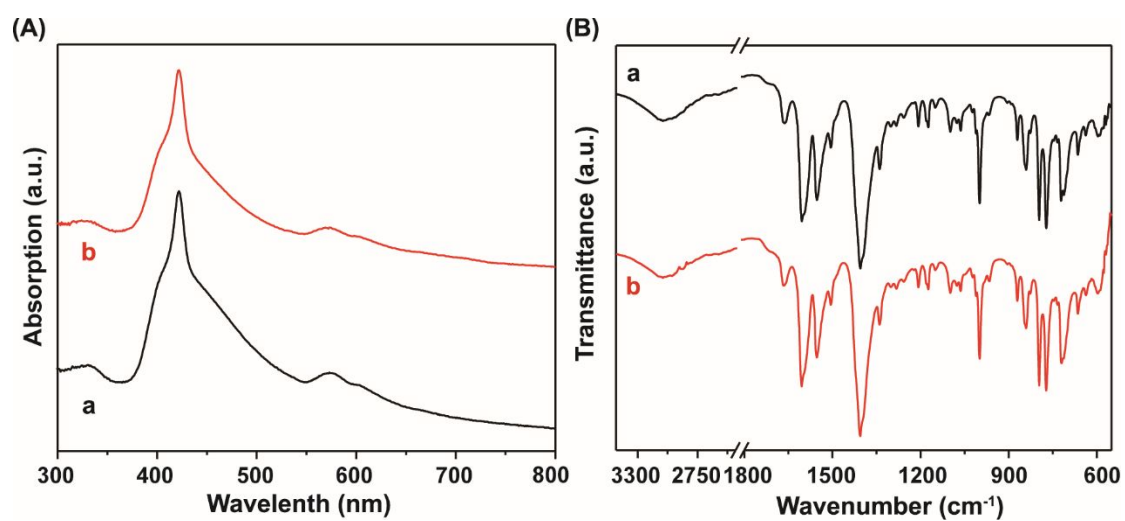

**Figure S2** (A) UV-vis absorption and (B) FTIR spectra of Zn-TCPP (a) and TCPP-Zn-BPS (b) synthesized in DMF/H<sub>2</sub>O (V/V, 2:1).

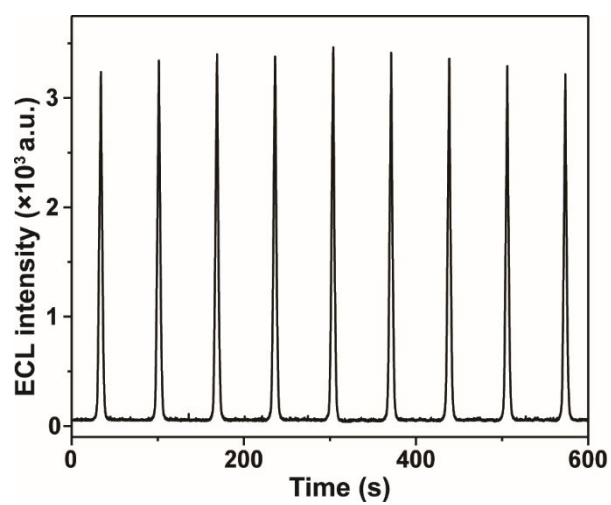

**Figure S3** ECL response of BPS-Zn-TCPP synthesized in DMF/H<sub>2</sub>O (V/V, 1:1) in 0.1M HEPES containing 0.3M KCl with 0.05 M H<sub>2</sub>O<sub>2</sub>, scan rate: 50 mV s<sup>-1</sup>.

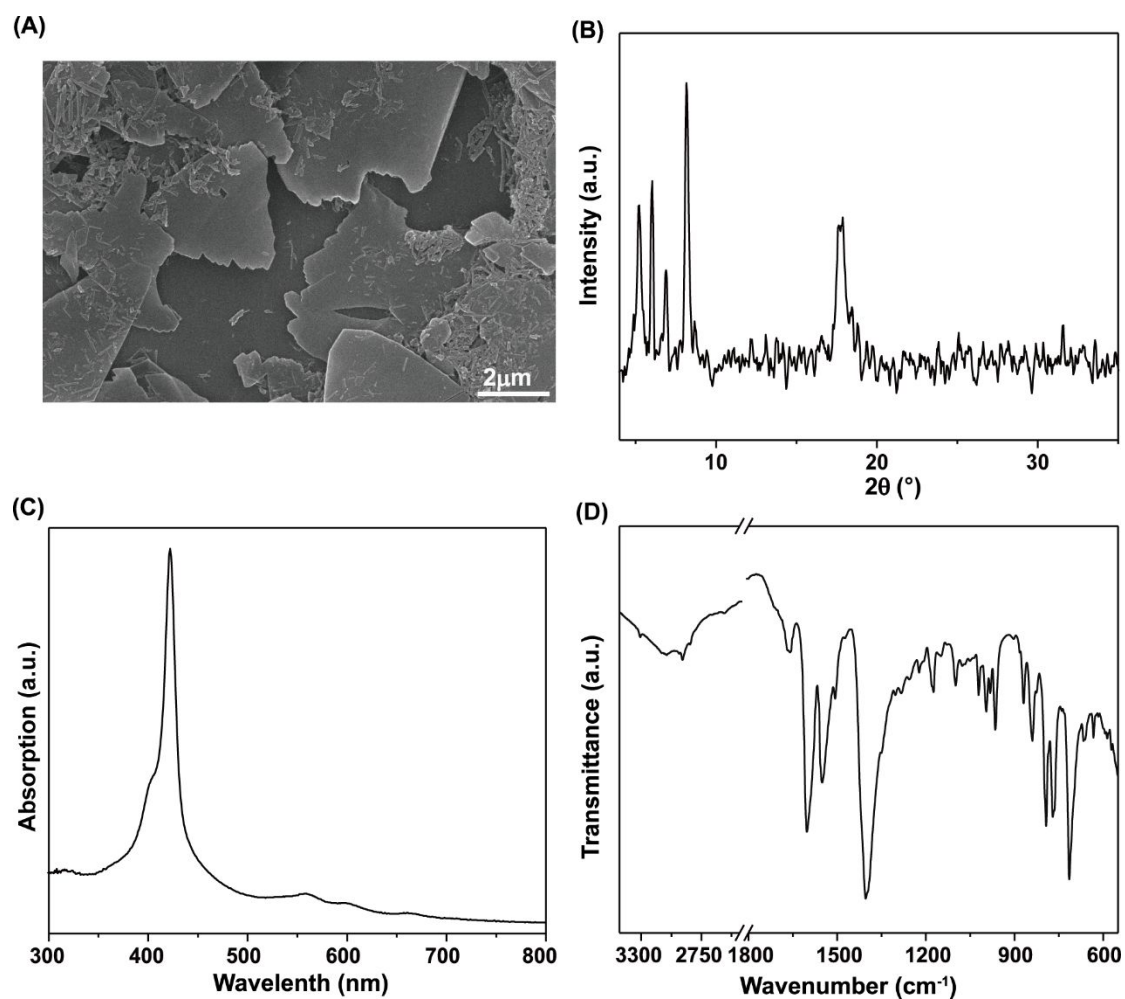

**Figure S4** (A) SEM images, (B) XRD powder pattern, (C) UV-vis absorption spectra and (D) FT-IR spectra of BPS-Zn-TCPP synthesized in DMF/H<sub>2</sub>O (V/V, 1:1).

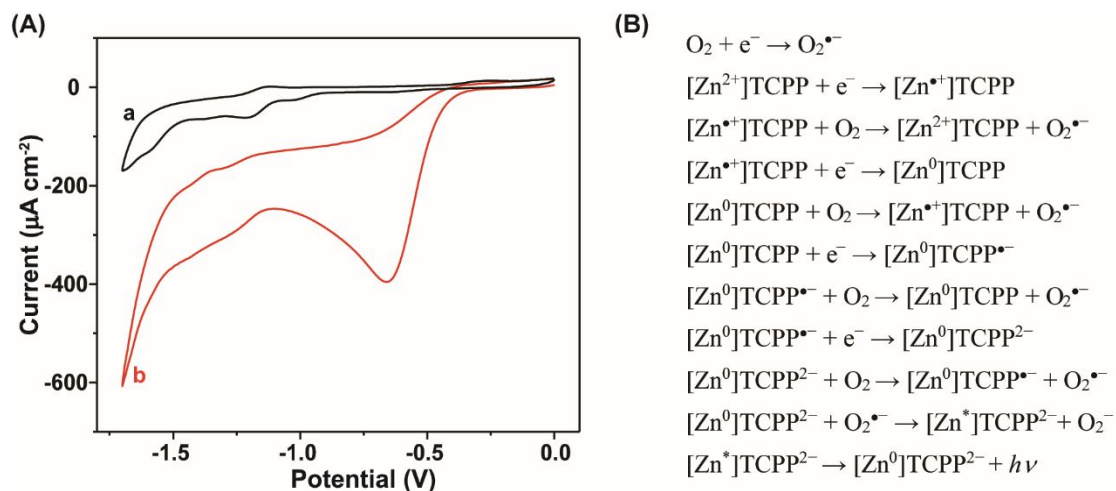

**Figure S5 (A)** Cyclic voltammograms of TCPP-Zn-BPS in  $\text{N}_2$ -saturated and  $\text{O}_2$ -saturated 0.1M pH 7.0 HEPES containing 0.3M KCl buffer solution. **(B)** The possible ECL mechanism with  $\text{O}_2$  as the co-reactant.

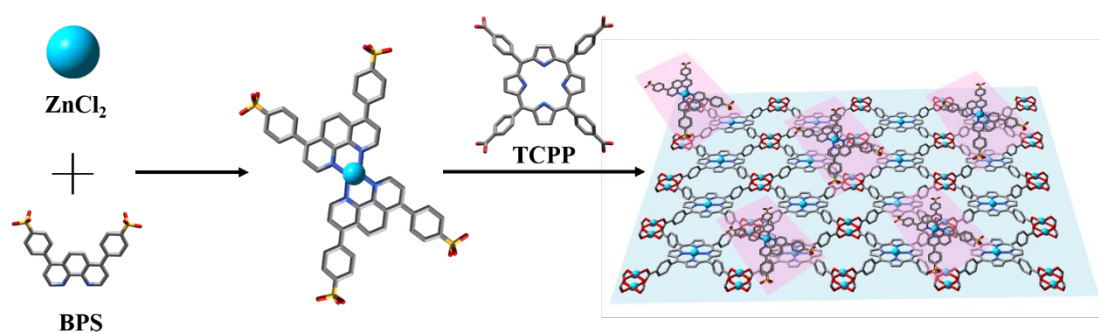

**Scheme S1** Schematic illustrations for the construction of BPS-Zn-TCPP.
